# Supplementary material
Source: PubMed Central journal article supplement (PMC7103508)

## Supplementary Information

### **FttA is a CPSF73 homologue that terminates transcription in Archaea**

Travis J. Sanders,<sup>1</sup> Breanna R. Wenck,<sup>1</sup> Jocelyn N. Selan,<sup>1</sup> Mathew P. Barker,<sup>1</sup> Stavros A. Trimmer,<sup>1</sup> Julie E. Walker,<sup>1,2</sup> and Thomas J. Santangelo<sup>1\*</sup>

<sup>1</sup>Department of Biochemistry and Molecular Biology, Colorado State University, Fort Collins, Colorado 80523, USA

<sup>2</sup>Present address: Watchmaker Genomics, Boulder, Colorado 80303, USA

\*Correspondence to: [thomas.santangelo@colostate.edu](mailto:thomas.santangelo@colostate.edu).

**Supplementary Information Figure 1. Clustal-Omega alignment of diverse archaeal (coral), eukaryotic (green), and bacterial (blue) FttA-homologues.**

BLASTp searches of the *T. kodakarensis* FttA protein (WP\_011250379.1; TK1428) against all bacterial genomes revealed full-length homologues – containing both KH domains and the metallo-beta-lactamase (MBL) fold – in candidate species of *Rokubacterium*, *Wolfbacterium*, and *Staskawiczbacterium*, as well as *Tenericutes bacterium* and *Desulfuromonadales bacterium* C00003096. It should be noted that all Mollicutes (*e.g.* *Tenericutes* *sps.*), all Cyanobacteria, and some Firmicutes are devoid of obvious rho homologues<sup>12</sup>. Many eukaryotic CPSF73 proteins contain C-terminal extensions not found in archaeal or bacterial homologues; an exception is the YSH1 protein of *S. cerevisiae*. Conserved (.), well-conserved (:), and invariant (\*) residues are noted. An active center histidine (H255 in *T. kodakarensis*) is highlighted in red.

|                                                    |                                                              |    |
|----------------------------------------------------|--------------------------------------------------------------|----|
| WP_011250379.1_Thermococcus_kodakarensis           | ----MIRRETFVDDILKEIREIIVQVMPREAGITDVEFEGPELVIVYVKNPEAMKDCGLI | 56 |
| WP_048048997.1_Methanosarcina_mazei                | -----MPLEVDLDDLKHKEKNLPAQVITDVEFEGPQLVLYTEPRKFAADDGNI        | 51 |
| WP_004044063.1_Haloferax_volcanii                  | -----MSSVQSLNLAIMEIIRNLTPEPTDIIISQIEYEGPEIAVYTKNPKLLEDNGLI   | 52 |
| OIO62505.1_Candidatus_Woeseearchaeota_archaeon     | -----MVLMMNI I KEILSQLP-EEKISDACFEGANIVLYTKDKEFFLDNGLI       | 49 |
| OLC36512.1_Thaumarchaeota_archaeon                 | MQRKTQQR---ELSPAPNIMGTILQSIPEKADVTKIDYEGPRIAITYTKNPRYLMHEHVI | 57 |
| OLS12352.1_Candidatus_Lokiarchaeota_archaeon_CR_4  | -----MIFVSEDSLNLAIMEIIRNLTPEPTDIIISQIEYEGPEIAVYTKNPKLLEDNGLI | 54 |
| TALS1517.1_Nanoarchaeota_archaeon                  | -----MSKIKELKQIP-EDKISDAQFEGANIVLYTKDKEFFVNNGLI              | 44 |
| WP_011007526.1_Pyrobaculum_aerophilum              | -----MSFVE-IENKVKAILSGEIVKVNVEGPNLCIYVVRPTED---VIDMI         | 44 |
| RLI34429.1_Candidatus_Bathyarchaeota_archaeon      | MPSRPLGGTQRPETIQSKIQVILQHVPKAEITRVEFEGPRLAIYTRKPEILLSSQSYIV  | 60 |
| WP_014513953.1_Sulfolobus_islandicus               | -----MNRLASLRNINTISLIYS-ELKDLGITRIEYEGPTIAVYVKKPTMVEKEVTI    | 52 |
| WP_011277529.1_Sulfolobus_acidocaldarius           | -----MSIRLNVNIAIYGMGPKKAGISKIDFEGPEIAVYVVRNPAVV---DGETV      | 46 |
| RLG13324.1_Candidatus_Nanohaloarchaeota_archaeon   | -----MELEDVKSRLPKTAMITKTLFEGSDIVFYTKNKDFVNGSSDI              | 43 |
| OLC64863.1_Candidatus_Rokubacteria_bacterium       | -----MTIEDILNDARSVVKVFPDHVEITQVDFEGPTIVYTKNMEVFAESNDIV       | 51 |
| OEU57241.1_Desulfuromonadales_bacterium_C00003096  | -----MPAEATLLALKRRITELLPPDVSVTGVEFEGPELVLYTEDTQRFVDDGALV     | 51 |
| OGM94118.1_Candidatus_Wolfecubacteria_bacterium    | -----MNCKLIETEILEKVRNALP-QEAI SRVELEGSELIVYTKDRDFVVKHEETV    | 50 |
| OGZ62538.1_Candidatus_Staskawiczbacteria_bacterium | -----MELLKN-ITDRL-KGKI TEASFEGANVLYTDAAEFPRRSGSKI            | 42 |
| RKX64688.1_Tenericutes_bacterium                   | -----MGIEETLSELRQRIRKNLPGVGTISDVEFEGPELVLYTKPRKRLADNGEIV     | 51 |
| NP_057291.1_Homo_sapiens                           | -----                                                        | 0  |
| NP_650738.1_Drosophila_melanogaster                | -----                                                        | 0  |
| NP_502553.2_Caenorhabditis_elegans                 | -----                                                        | 0  |
| NP_013379.1_Saccharomyces_cerevisiae               | -----                                                        | 0  |

|                                                    |                                                                |     |
|----------------------------------------------------|----------------------------------------------------------------|-----|
| WP_011250379.1_Thermococcus_kodakarensis           | KNLAKVLKRRISVRPDDPILLPPEKAEELIKQLVPEAEITNISDFPSVGEVLEIARKPG    | 116 |
| WP_048048997.1_Methanosarcina_mazei                | RNLAKELRTRIAMRPPVRLATPEDSISIIEEVVPEKESISSYDFDPSGEVIEAEKPG      | 111 |
| WP_004044063.1_Haloferax_volcanii                  | RKLAKLKRRIIVRPDDPDLSDPRAEAPKILSVIPEAGVTDLDPHIDTGEVVEAEKPG      | 112 |
| OIO62505.1_Candidatus_Woeseearchaeota_archaeon     | RKIVNDIKRVELRPPDAITLIEDAEALKISVPIPEAGVDKIIDFPQSRVIEAEKPG       | 109 |
| OLC36512.1_Thaumarchaeota_archaeon                 | SNMNVNKKRIIVRSDPEIRMKPEAEERFIRSIIVPEAEITNITFDENIGEVVEAEKPG     | 117 |
| OLS12352.1_Candidatus_Lokiarchaeota_archaeon_CR_4  | KNLAKLKRRIIVRSDPVRDRKEETANYIRTLVTDSEITKVTFDENMGEVTEAEKPG       | 114 |
| TALS1517.1_Nanoarchaeota_archaeon                  | RKIVDDIKRVELRPPDKITSDPVKAEERKIMVPEAGVSNVDFPARSQVIEAEKPG        | 104 |
| WP_011007526.1_Pyrobaculum_aerophilum              | GEVAKTLKRRVILRVPNSRASEKTAASKVIREVLSDD---VEDVVFENN-GDVIYLAAPL   | 100 |
| RLI34429.1_Candidatus_Bathyarchaeota_archaeon      | SDIVSLIRKRIIVRSDPEIRMKPEAEERFIRSIIVPEAEITNITFDENIGEVVEAEKPG    | 120 |
| WP_014513953.1_Sulfolobus_islandicus               | KKIAKDKKRII KADPSVRDKKEAVEIKKIIVTPEAVIDIKFDDDLGEVLIKAKKPG      | 112 |
| WP_011277529.1_Sulfolobus_acidocaldarius           | KKIAKEIKRVRVADPKSRDKKEETKEIKNIIVPQEAQIIDIKFDDDLGEVLIKAKKPG     | 106 |
| RLG13324.1_Candidatus_Nanohaloarchaeota_archaeon   | KALVSEIRKRIINLRPDQSIITLAEADKAREKIRTVIPKAEIQDILFEPFEGKVIILAQKPG | 103 |
| OLC64863.1_Candidatus_Rokubacteria_bacterium       | RQIAQQLRRRIIVRSDPILLSAQEDAERKIREVPEAGITGVYFETETGEVTEALAPG      | 111 |
| OEU57241.1_Desulfuromonadales_bacterium_C00003096  | RTLAKELKRRISVRPSSDILMDPEKASKAHEIIPPEGGIKDIYFDMDKAEVIEAEKPG     | 111 |
| OGM94118.1_Candidatus_Wolfecubacteria_bacterium    | RQVVDLKKRIIVRSDPEIRMKPEAEERFIRSIIVPEAEITNITFDENIGEVVEAEKPG     | 110 |
| OGZ62538.1_Candidatus_Staskawiczbacteria_bacterium | KEIVNEIKKRIELRADKILKDAEETEKEIRKSIPEAEITNITFDENIGEVVEAEKPG      | 102 |
| RKX64688.1_Tenericutes_bacterium                   | RSTIAQVRRKRIIVRSDPVLSDPADATAAEIKIAPSDAGITDYCFDSDTGEVVEAEKPG    | 111 |
| NP_057291.1_Homo_sapiens                           | -----                                                          | 0   |
| NP_650738.1_Drosophila_melanogaster                | -----                                                          | 0   |
| NP_502553.2_Caenorhabditis_elegans                 | -----                                                          | 0   |
| NP_013379.1_Saccharomyces_cerevisiae               | -----                                                          | 0   |

|                                                    |                                                                 |     |
|----------------------------------------------------|-----------------------------------------------------------------|-----|
| WP_011250379.1_Thermococcus_kodakarensis           | LVIGKNGETLRLITQKVHWPVRVTRTP-----IQSQTIIYSIRSIQTESKDRRKLFRQV     | 171 |
| WP_048048997.1_Methanosarcina_mazei                | LVIGKHGATREITKQIGWIPKVVTRTP-----IKSRTVKNIREFMRNKLKERKELIKTV     | 166 |
| WP_004044063.1_Haloferax_volcanii                  | MVIGRHGSTRLEITQKVGWTEVVRTRTP-----IESSTVSNRNLKQERDRRRLIERT       | 167 |
| OIO62505.1_Candidatus_Woeseearchaeota_archaeon     | LAIGKQGDILREIRKTLWVPLIRKKA-----IRSQLIENIRAVLYQNSDYRRKFLDKI      | 164 |
| OLC36512.1_Thaumarchaeota_archaeon                 | LLNNAEVENMVDLVSITGWVRRIRKATT-----AQSQTIQIINYNLKIISSTERSKHLRQI   | 172 |
| OLS12352.1_Candidatus_Lokiarchaeota_archaeon_CR_4  | LVIGKLGANRISIRMETLWRPIVVRTRTP-----IDSKTVKIVRHLKTERGVKELLIRI     | 169 |
| TALS1517.1_Nanoarchaeota_archaeon                  | LAIGKQGSILREIREKTFWVFFIRTRTPA-----IRSVLIENIRAVLYQNSDYRRKFLHVK   | 159 |
| WP_011007526.1_Pyrobaculum_aerophilum              | R-EKEIKSATREIPVKTGWRAVIESGVKDRVLPKTHEIVGRVIRFHSAVAQRMELMESL     | 159 |
| RLI34429.1_Candidatus_Bathyarchaeota_archaeon      | LVISKNGATLQEIIVKTVKWRPILRTRTP-----IPSKI IAHIRHLYQVQEKORILRSV    | 175 |
| WP_014513953.1_Sulfolobus_islandicus               | LVIGKGGSLQRIIPAEITFWKAEIVREPP-----IRSRTYDSILEHLYNETEYRAKILKVF   | 167 |
| WP_011277529.1_Sulfolobus_acidocaldarius           | LVIGKGGSIQKIIIPAEITFWVWRPIVREPP-----LKSRTYDGLVTHIYNETEYRAKALRFI | 161 |
| RLG13324.1_Candidatus_Nanohaloarchaeota_archaeon   | IVIGKGTREIREIKTFWVFNPIQRMPG-----FRSKIVNKAREIVHEEAKYRQOFLNKI     | 158 |
| OLC64863.1_Candidatus_Rokubacteria_bacterium       | MVIGRHGGSVLEIKKRIWAPKVVTRTP-----IPSKTVEEIRQYLRITINDERQVFLKQV    | 166 |
| OEU57241.1_Desulfuromonadales_bacterium_C00003096  | LVIGTHGATREITKQIGWIPKVVTRTP-----IQSPTIKSIRRYLREESDFRKSFLKQV     | 166 |
| OGM94118.1_Candidatus_Wolfecubacteria_bacterium    | LVIGRGGTFRQIRAEITFWVPRIRVTRTP-----IKSDVIDGIRKVLHQVFKRKEFLNKI    | 165 |
| OGZ62538.1_Candidatus_Staskawiczbacteria_bacterium | MVIGKRGILDELKHTFWSQVQRSPA-----IKSKIVENIREVLYANNYRRRFLNSV        | 157 |
| RKX64688.1_Tenericutes_bacterium                   | LVIGQHGSMLEIRITRYIGWTPKVVTRTP-----IESSTKNVRHVLRESLDERKQILREL    | 166 |
| NP_057291.1_Homo_sapiens                           | -----                                                           | 0   |
| NP_650738.1_Drosophila_melanogaster                | -----                                                           | 5   |
| NP_502553.2_Caenorhabditis_elegans                 | -----MTQAT                                                      | 0   |
| NP_013379.1_Saccharomyces_cerevisiae               | -----                                                           | 0   |

|                                                    |                                                                 |     |
|----------------------------------------------------|-----------------------------------------------------------------|-----|
| WP_011250379.1_Thermococcus_kodakarensis           | GRNIYR---KSEYKSRWIRITGLGGFREVGRSALLVQTDSESVLVDFGVNIAALKDPTKAY   | 229 |
| WP_048048997.1_Methanosarcina_mazei                | GRKIHR---ECTSKDQWVVRTALGGCKEVGRSFLLS*PESRILIDCGVNGVSGDE---NMT   | 221 |
| WP_004044063.1_Haloferax_volcanii                  | GROIHR---EQLSDEEWRITLGLCCREVGRASFIVS*PETRILVDCGDKPGSD---DV      | 220 |
| OIO62505.1_Candidatus_Woeseearchaeota_archaeon     | GHRIDYDQWIREKKNWIRVSVLGGARQVGRSCLFLQ*PESRILIDCGVNIAS-D-KDAY     | 221 |
| OLC36512.1_Thaumarchaeota_archaeon                 | GEQIFR---PKLSEDAEVSILITLGGFQVGRSCLL*THESKILVDCGVPNGA-RSPMEAF    | 229 |
| OLS12352.1_Candidatus_Lokiarchaeota_archaeon_CR_4  | GKRIHR---PVIKPDATIKLTALGAPREVGRSCLLQVNSQES*TVLVDGCLNNGS---PTEPF | 224 |
| TALS1517.1_Nanoarchaeota_archaeon                  | GRIYDSVWREKREGWIRVSVLGSAREVGRSCLLQ*NESRVLLDCGINIAA-NSPDLAY      | 218 |
| WP_011007526.1_Pyrobaculum_aerophilum              | ARYIHQ---EPVVKGEPTITVPLGAAMEVGRSALLV*STNESVLLDCGLKPAQN---DEEF   | 214 |
| RLI34429.1_Candidatus_Bathyarchaeota_archaeon      | GRIIFR---APIYKQSVLITPLGGFQVGRSALLV*STNESVLLDCGINPCT-ANPESDF     | 232 |
| WP_014513953.1_Sulfolobus_islandicus               | GRIIFR---EIVQKDFVIRITLALGPLEVGRSALLV*STNESVLLDCGINPCT-ANPESDF   | 225 |
| WP_011277529.1_Sulfolobus_acidocaldarius           | GRIIFR---DILFKDFVIRITLALGPLEVGRSALLV*STNESVLLDCGINPCT-ANPESDF   | 218 |
| RLG13324.1_Candidatus_Nanohaloarchaeota_archaeon   | GQKIQI---KKGSGEGRVRSALGSGFVGRSCLLQ*TESKVLVLLDCGINVNGS-N---EMN   | 212 |
| OLC64863.1_Candidatus_Rokubacteria_bacterium       | GRRLAR---EVPNGEIVRITLALGGFQVGRSALLS*TRLSKVLIDCGVLSIED---NGS     | 220 |
| OEU57241.1_Desulfuromonadales_bacterium_C00003096  | GRIIFR---DKSKEDEWIRITLALGGFQVGRSALLS*TRLSKVLIDCGVLSIED---NGS    | 219 |
| OGM94118.1_Candidatus_Wolfecubacteria_bacterium    | GKIFPS---ERKNTDWRITLIPLGGFQVGRSCLL*ETPKSKVLIDCGIAPGC-QG-ADAF    | 221 |
| OGZ62538.1_Candidatus_Staskawiczbacteria_bacterium | GKIIYEDWDPKRTDEWIRITLPLGARQVGRSCLLQ*TPNSKVLVLLDCGINVSS-QG-EDFK  | 215 |
| RKX64688.1_Tenericutes_bacterium                   | GKIIHR---SITSPDNIRITLALGGFQVGRSCLL*TPTRVLLDCGINVADDDH---GTT     | 222 |
| NP_057291.1_Homo_sapiens                           | ---MSA---IPAESDQLLRPLRPLGAGQEVGRSCLILEFGRKIMLDCGHPGLE---GMDAL   | 53  |
| NP_650738.1_Drosophila_melanogaster                | ---GDAR---MPDEESDLQIKPLGAGQEVGRSCLIMLEFGRKIMLDCGHPGLE---GMDAL   | 52  |
| NP_502553.2_Caenorhabditis_elegans                 | ---ME---EGDSDSLCFTPLGSGEVGRSCLILEYKGRVMLDCGHPGLH---GVDAL        | 59  |
| NP_013379.1_Saccharomyces_cerevisiae               | ---MERTNTTTFKFFLGGSGEVGRSCLILQYKGTVMLDAGIHPAYQ---GLASL          | 50  |

|                                                    |                           |                                     |     |
|----------------------------------------------------|---------------------------|-------------------------------------|-----|
| WP_011250379.1_Thermococcus_kodakarensis           | PHFDAPEFRYVLDGLLDAIITHA   | LDHSGMLPYLFRYKLDGPIYITPPTRDLMTLLQ   | 289 |
| WP_048048997.1_Methanosarcina_mazei                | PYLYVPEVF---PLNQIDAVIVTHA | LDHQGLVPLLFKYG-YEGPVYCTPPTRDLMLVLLQ | 277 |
| WP_004044063.1_Haloferax_volcanii                  | PYLQVPEAL-GSGANLDAVLTSHA  | LDHSALIPLLFKYG-YDGPYITTEPRDLMLGQT   | 278 |
| OIO62505.1_Candidatus_Woeseearchaeota_archaeon     | PYLEAPEFN----INLDAVLTSHA  | LDHCGFIPYLYKYG-YRGPVYCTAPTRDVSALL   | 276 |
| OLC36512.1_Thaumarchaeota_archaeon                 | PRLDWPNIT---LDELDAVISHA   | LDHTGFLPVLKYG-YRGPVYCTEPLPMNLLQ     | 284 |
| OLS12352.1_Candidatus_Lokiarchaeota_archaeon_CR_4  | PLFDLPVFD---IDSLDAVITSHA  | LDHSGMIPYLYKYG-YDGPYISTPLRHLSTMLQ   | 279 |
| TAL51517.1_Nanoarchaeota_archaeon                  | MLEAPEFED---LQKLDAILSHA   | LDHCGFIPYLYKYG-FRGPVYCTPPTRDISALM   | 273 |
| WP_011007526.1_Pyrobaculum_aerophilum              | PLLDLID----IDRLDAVLTSHA   | MDHVGLCPFLFKYG-YRGPVYCTDTPKYQAFILL  | 267 |
| RLI34429.1_Candidatus_Bathyarchaeota_archaeon      | PRLDNEFD---LSDDAVISHA     | LDHCGLLPPLYKYG-YDGPVYCTEPLSLMALLQ   | 287 |
| WP_014513953.1_Sulfolobus_islandicus               | PRLDIDQLK---IEELDAVITSHA  | LDHCGMVPFLFKYG-YEGPVYTPVTRDIMALMQ   | 280 |
| WP_01127529.1_Sulfolobus_acidocaldarius            | PRLDIDQVK---LEDDAVITSHA   | LDHCGMVPFLFKYG-YEGPVYTPVTRDIMALAQ   | 273 |
| RLG13324.1_Candidatus_Nanohaloarchaeota_archaeon   | PYIDAPEFD---LESDDAVISHA   | LDHSGFAPLYEYG-YKGPLYITPLTRDVMTLLQ   | 267 |
| OLC64863.1_Candidatus_Rokubacteria_bacterium       | PYLNAPVEM---PLGSDAVITSHA  | LDHSGLVLPALYKYG-YDGPYITPPTRDLMSLLQ  | 276 |
| OEU57241.1_Desulfuromonadales_bacterium_C00003096  | PYLYVPEVT---PLSDIDAVITSHA | LDHTGLVPLLFQYA-YDGPYIMTQPTDLMLVLL   | 275 |
| OGM94118.1_Candidatus_Wolfbacteria_bacterium       | PLLTTKFED---PAELDAVISHA   | MDHVGFVPLFEYG-YEGPLYCTPTDLDFALLD    | 276 |
| OGZ62538.1_Candidatus_Staskawiczbacteria_bacterium | PIFNIPEDF---INQLDAVISHA   | IDHVGMPVFLKYM-YRGPVYMLPTDRDISLLA    | 270 |
| RKX64688.1_Tenericutes_bacterium                   | PYLYPEVVS---PITHLDGVVTHA  | LDHCGLVPLLFKYG-YRGPVYATPPSRDLMALQ   | 278 |
| NP_057291.1_Homo_sapiens                           | PYIDLID----PAEIDLILLSHF   | LDHCGALPWLQKTSFKGRFMTHATKAIYRWLL    | 107 |
| NP_650738.1_Drosophila_melanogaster                | PYVDLIE----ADEIDLLFISHF   | LDHCGALPWLKMTSFKGRCFMTHATKAIYRWLL   | 113 |
| NP_502553.2_Caenorhabditis_elegans                 | PFVDVFE----IENIDLLITHF    | LDHCGALPWLQKTAFOGKCFMTHATKAIYRWLL   | 106 |
| NP_013379.1_Saccharomyces_cerevisiae               | PYDFEFD----LSKVDLILLSHF   | LDHAASLPYVMQRTNFQGRVFMTHATKAIYRWLL  | 104 |

|                                                    |                                                              |     |
|----------------------------------------------------|--------------------------------------------------------------|-----|
| WP_011250379.1_Thermococcus_kodakarensis           | QDFIEIQHMNG-----VEPLYRPKDIKEVIKHTITLDYGEVRDIAPDIRLTLHNAGH    | 341 |
| WP_048048997.1_Methanosarcina_mazei                | LDYIDVAKEG-----KKIPYESGMVAKTLKHTIPLDYEEVTDIAPDIKLTFNHAG      | 329 |
| WP_004044063.1_Haloferax_volcanii                  | LDYLDVASKEG-----RTPPYESEMVREAIKHTIPLDYEGDVTDIAPDVKLTFNHAG    | 330 |
| OIO62505.1_Candidatus_Woeseearchaeota_archaeon     | LDYIKIMRNSG-----KEPFTIDDIKEMVKHTICLDYNEVSDITPPVRIITYNAGH     | 328 |
| OLC36512.1_Thaumarchaeota_archaeon                 | LDIAKVAQAQ-----KVPLYSERDVQVMKQITPLSYGVVTDISPDIKLVFSNAGH      | 336 |
| OLS12352.1_Candidatus_Lokiarchaeota_archaeon_CR_4  | LDYIQITEKG-----KICPYKKGVDKDAVLTIPLQYGEVTDIAPDIKLTNHSNGH      | 331 |
| TAL51517.1_Nanoarchaeota_archaeon                  | IDAVIKIQRSEN-----KEPLYTTEVKEVFKHTITLDYGEVTDITPDIRITFNHAG     | 325 |
| WP_011007526.1_Pyrobaculum_aerophilum              | SDVVELKEREK-----LQPSYSKADITVIYHTITLDYEEVTDIAPDIKLTFFDAGH     | 319 |
| RLI34429.1_Candidatus_Bathyarchaeota_archaeon      | LDYLDVLSREG-----IQPPYDQKDVREMLHTIPLRQYGVVTDIAPDIKLTNHSNGH    | 339 |
| WP_014513953.1_Sulfolobus_islandicus               | LDLSDVVEKEG-----KPLPYSAAKEVRKELLHTITLDYGEVTDIAPDIRLTFYNAGH   | 332 |
| WP_01127529.1_Sulfolobus_acidocaldarius            | LDALDVVAKEG-----RPYPYTAKEVRRELLHTITLDYGEVTDIAPDVKLTFNHAG     | 325 |
| RLG13324.1_Candidatus_Nanohaloarchaeota_archaeon   | LDIDVQLRET-----GKAPYTSMGIKNAIKHSITLDYNEVCDITPDMRLTFQNGH      | 319 |
| OLC64863.1_Candidatus_Rokubacteria_bacterium       | IDIKVAMGEA-----RKSPYDSSNIRKAVANTIPLKYGETTDIAPDVRLTFQNGH      | 328 |
| OEU57241.1_Desulfuromonadales_bacterium_C00003096  | LDYLEVAAREG-----NKIPYKSSRIDAIRHTIPLKYGDVTDISPDIKLTNHSNGH     | 327 |
| OGM94118.1_Candidatus_Wolfbacteria_bacterium       | LDYIDVAQNG-----VNPAYTVKGVKAVRHSISLEYGEVSDVAPDVRLTFQNGH       | 328 |
| OGZ62538.1_Candidatus_Staskawiczbacteria_bacterium | LDIFGVAYKQA-----EKPLYSSTDIKEMVKHSICLDYNEVSDITPDIRITFNHAGH    | 322 |
| RKX64688.1_Tenericutes_bacterium                   | IDYIDVAMKEG-----RRIYPSSEMVREALKHTITLDYGSVTDIAPDMKLTNHSNGH    | 330 |
| NP_057291.1_Homo_sapiens                           | SDYVKSMSISA-----DMLYTTELDSESMKDIETINFEHVKEVA-GIKFVCYHAGH     | 158 |
| NP_650738.1_Drosophila_melanogaster                | SDYIKISNITP-----EQMLYTEADLEASMEKIETINFEHRDVM-GVRFCAIYAGH     | 164 |
| NP_502553.2_Caenorhabditis_elegans                 | GDVVRISYKGGP-----DRNQLYTEDELKSMAKIETIDFRQKEVN-GIRFPYVAGH     | 159 |
| NP_013379.1_Saccharomyces_cerevisiae               | RDFVRRVTSIGSSSSMGTKEGLFSDDELVDVDFDKIETVDYHSTVDVM-GIKFTAFHAGH | 163 |

|                                                    |                                                                 |     |
|----------------------------------------------------|-----------------------------------------------------------------|-----|
| WP_011250379.1_Thermococcus_kodakarensis           | ILGSSIVHLHIGNGLHNIAITGDFKFIPTRLPEFAPSRFRLETLVMESTYGGSDNYQMP     | 401 |
| WP_048048997.1_Methanosarcina_mazei                | ILGSAISHFHI GDLGNVVTGDKYKERTLFDPAVNFPRVETVISEATYGNANAFQPA       | 389 |
| WP_004044063.1_Haloferax_volcanii                  | ILGSAVSHFHI GDLGNVAVSGDIHYEDTRLPNGAVNDFPRVETLVLESTYGGSDNYQMP    | 390 |
| OIO62505.1_Candidatus_Woeseearchaeota_archaeon     | ILGSSMVMHVMGGLNHI VYTGDMKFGKTRLLDIAVTKFPRVETLMIESTYGGSDNYQMP    | 388 |
| OLC36512.1_Thaumarchaeota_archaeon                 | ILGSAVSHFHI GNGNHNFYSGDLKYGKSMLEPESAVNFWPRIETLLIESTYGAKEDIQAT   | 396 |
| OLS12352.1_Candidatus_Lokiarchaeota_archaeon_CR_4  | ILGAALVHLHIGEGAAHNLVVTGDFKFKQKTRLESATVNFPRLETLVTEATYGGKDEIPT    | 391 |
| TAL51517.1_Nanoarchaeota_archaeon                  | ILGSAMTHLHI GNLGNLNLVYSDSKYAKTSLLDPAVTFDPRLESMLIESTYGGSDNYQMP   | 385 |
| WP_011007526.1_Pyrobaculum_aerophilum              | EIGSAMAHLHI GNGRYNLYTGDFKFKQKTRLLNRAANKFKRVEMLIMESTYGGSDNYQMP   | 379 |
| RLI34429.1_Candidatus_Bathyarchaeota_archaeon      | ILGSAIHLHI GEGLNHIVYTGDFKFKAKTMLLESASVAPRLETLMIEATYGSSEVDMVP    | 399 |
| WP_014513953.1_Sulfolobus_islandicus               | ILGSAMAHLHI GDEGKHIVYTGDFKFKAKTMLLDKANTEFPRVDTLMIMETTYGAQD--QPN | 390 |
| WP_01127529.1_Sulfolobus_acidocaldarius            | ILGSAMAHLHI GEGLNHIVYTGDFKFKAKTMLLDKANTEFIRVDTLMIMETTYGAHD--QPN | 383 |
| RLG13324.1_Candidatus_Nanohaloarchaeota_archaeon   | ILGSALTHIHI GEGLNHLLYADLKGKPTKLEPAYMGFSRIESMLIESTYGAKPDIIPS     | 379 |
| OLC64863.1_Candidatus_Rokubacteria_bacterium       | ILGSAVSHFHI GDLGNVAVSGDIKFKETWLPNPAVNFPRLETLVLESTYGGYHDIQPS     | 388 |
| OEU57241.1_Desulfuromonadales_bacterium_C00003096  | ILGSSVYVPHVGNGLNHI AFSGDIKYERTLFDPAFNGFPRLETLIMESTYGGANDMQP     | 387 |
| OGM94118.1_Candidatus_Wolfbacteria_bacterium       | ILGSAVHLHI GEGMHNIVYGLDQKPARTNLLEPAFTDFQRCETLLIESTYGGVADIQPP    | 388 |
| OGZ62538.1_Candidatus_Staskawiczbacteria_bacterium | VLGSAMVHI NI GNGSNLTYTGDFKFKMTRLEPATIYFPRLESVITESTYGAKEVDFQP    | 382 |
| RKX64688.1_Tenericutes_bacterium                   | ILGSAVSHFHVGDGLNHLVVTGDFKFKYKTRLFDSAINNPRAEVIMIEATYGGPNDPQP     | 390 |
| NP_057291.1_Homo_sapiens                           | VLGAAMFMEIA--GVKLLYTGDFSRQEDRHLMAAEIPNKPDIILIESTYGTHI--HEK      | 214 |
| NP_650738.1_Drosophila_melanogaster                | VLGAAMFMEIA--GKILYTGDFSRQEDRHLMAAEVPMKPDVILIESTYGTHI--HEK       | 220 |
| NP_502553.2_Caenorhabditis_elegans                 | VLGACQFMEIA--GVRVLYTGDFSCLEDRHLCAAEIPPTQVILIESTYGTQ--HEK        | 215 |
| NP_013379.1_Saccharomyces_cerevisiae               | VLGAAMFQIEIA--GLRVLTGDFYSREVDRLHNSAEVPLSSNVLIEVSTFGTAT--HEP     | 219 |

|                                                    |                                                               |     |
|----------------------------------------------------|---------------------------------------------------------------|-----|
| WP_011250379.1_Thermococcus_kodakarensis           | REEAEKRLIEVHITLKRGGKVLIPAMAVGRAQEIIMVLEEYARVGGI----EVPYIYLD   | 456 |
| WP_048048997.1_Methanosarcina_mazei                | LKDAEKHLQMVVKNTERGGIIVIPAFVAVGRSQEVMIVLEESIRKGLI----PEVPVYLD  | 445 |
| WP_004044063.1_Haloferax_volcanii                  | QQDSEERLIEVINETYDRGGKVIIPAFVAVGRSQEIMLVLEAMRSGKI----PEMPVHLD  | 446 |
| OIO62505.1_Candidatus_Woeseearchaeota_archaeon     | RKCEENEFADIKRTIDRKGILVPLVLSGGRSQEVLINVENIRNGKI----EKVPVFD     | 444 |
| OLC36512.1_Thaumarchaeota_archaeon                 | REVEVEGAFVKSNETLRNGGKVLIPAVGRAQELMMVINQYMLGQL----MEAPVTE      | 452 |
| OLS12352.1_Candidatus_Lokiarchaeota_archaeon_CR_4  | RHESQELVNLINTLMRGGKMLIPVAVGRAQEIILIEEMIAKAKRI----EAVPVYVD     | 447 |
| TAL51517.1_Nanoarchaeota_archaeon                  | KESEDEYLAHVKNITLARGGKILIPVAVGRAQEIIMVIVNLRAGSI----DAVPIYLD    | 441 |
| WP_011007526.1_Pyrobaculum_aerophilum              | RVEAENALAKHVSDAVTRGGKVLIPAFVAVGRSQEILVILNKMMEGGLI----PRVPVYVD | 435 |
| RLI34429.1_Candidatus_Bathyarchaeota_archaeon      | RPEVEARFVSIIVNTRNGGKVLIPVAVGRAQEIIMLVLDQHIRNGSL----PEVPIYLD   | 455 |
| WP_014513953.1_Sulfolobus_islandicus               | RESESELEIEINKTLNRGGKVLIPVAVGRSQEIMLINDFMKKKLI----PEVPIYLD     | 446 |
| WP_01127529.1_Sulfolobus_acidocaldarius            | RESEALKIDIINKTISGGKVLIPVAVGRSQEIMLVINDAMKMKI----PEVPIYIT      | 439 |
| RLG13324.1_Candidatus_Nanohaloarchaeota_archaeon   | KREADMNLMEVIKRTINRGGKVIIPAFVAVGRAQEVVVLDAEYSRGL----EVPVYLD    | 434 |
| OLC64863.1_Candidatus_Rokubacteria_bacterium       | RHEAQQKKEVIRRVLRGGKVLIPVAVGRSQEVMVLEEDAMNRQI----PEVPIYLD      | 444 |
| OEU57241.1_Desulfuromonadales_bacterium_C00003096  | RREAEKRLDAVTKTERGGKVIIPAFVAVGRSQEVMIALEG----MD----LEVPIYLD    | 438 |
| OGM94118.1_Candidatus_Wolfbacteria_bacterium       | RQETERMFLDAVNKTEAGAGVLPFAVAVRAQEMMTILATN----N----FQYVYLD      | 439 |
| OGZ62538.1_Candidatus_Staskawiczbacteria_bacterium | RREAEKFDLNTMTIERGGKVLIPVAVGRAQETMLIETADIAKGRM----KKIPVYLD     | 438 |
| RKX64688.1_Tenericutes_bacterium                   | RNVAEKNISEIVKRTIERGGKVIIPAFVAVGRSQDVMVLEAMRKKRI----EQVPIYLD   | 446 |
| NP_057291.1_Homo_sapiens                           | REEREARCNTVHDIIVNRGGKVLIPVAVGRAQELLLILDEYQNHPEL----HDPIIYA    | 271 |
| NP_650738.1_Drosophila_melanogaster                | REDRENRFSLVQVQGGKVLIPVAVGRAQELLLILDEYQNHPEL----HDPIIYA        | 277 |
| NP_502553.2_Caenorhabditis_elegans                 | RAVREKRTQMVHIVTRGGKVIIPAFVAVGRAQELMLILDEYQNHPEL----HDPIIYA    | 272 |
| NP_013379.1_Saccharomyces_cerevisiae               | RLNREKRLTQLIHSTVMRGGKVLIPVAVGRAQEIIMLVLEAMRKKRI----HDPIIYA    | 279 |



|                                                    |                                                               |     |
|----------------------------------------------------|---------------------------------------------------------------|-----|
| WP_011250379.1_Thermococcus_kodakarensis           | -----                                                         | 648 |
| WP_048048997.1_Methanosarcina_mazei                | -----                                                         | 637 |
| WP_004044063.1_Haloferax_volcanii                  | -----                                                         | 640 |
| OIO62505.1_Candidatus_Woeseearchaeota_archaeon     | -----                                                         | 633 |
| OLC36512.1_Thaumarchaeota_archaeon                 | -----                                                         | 643 |
| OLS12352.1_Candidatus_Lokiarchaeota_archaeon_CR_4  | -----                                                         | 638 |
| TAL51517.1_Nanoarchaeota_archaeon                  | -----                                                         | 633 |
| WP_011007526.1_Pyrobaculum_aerophilum              | -----                                                         | 634 |
| RLI34429.1_Candidatus_Bathyarchaeota_archaeon      | -----                                                         | 646 |
| WP_014513953.1_Sulfolobus_islandicus               | -----                                                         | 638 |
| WP_011277529.1_Sulfolobus_acidocaldarius           | -----                                                         | 631 |
| RLG13324.1_Candidatus_Nanohaloarchaeota_archaeon   | -----                                                         | 626 |
| OLC64863.1_Candidatus_Rokubacteria_bacterium       | -----                                                         | 635 |
| OEU57241.1_Desulfuromonadales_bacterium_C00003096  | -----                                                         | 628 |
| OGM94118.1_Candidatus_Wolfecubacteria_bacterium    | -----                                                         | 630 |
| OGZ62538.1_Candidatus_Staskawiczbacteria_bacterium | -----                                                         | 627 |
| RKX64688.1_Tenericutes_bacterium                   | -----                                                         | 541 |
| NP_057291.1_Homo_sapiens                           | VKRNFNHYHLSPCDLSNYTDLAMSTVKQTQAIPTGPFNLLCYQLKLTGDVEELEIQE-    | 544 |
| NP_650738.1_Drosophila_melanogaster                | VKRDFFKHYLLAPSDLGKYTDMMSVVTQRQSIPWGSLSLTLLELLDRIGAGCQVEV-LEA- | 549 |
| NP_502553.2_Caenorhabditis_elegans                 | VKNPFSYIMVPEELGSYTSLSRISLEQRMSVHYSGLKLLIFNLQLNDACLINIKL       | 545 |
| NP_013379.1_Saccharomyces_cerevisiae               | -----                                                         | 474 |

|                                                    |                                                               |     |
|----------------------------------------------------|---------------------------------------------------------------|-----|
| WP_011250379.1_Thermococcus_kodakarensis           | -----                                                         | 648 |
| WP_048048997.1_Methanosarcina_mazei                | -----                                                         | 637 |
| WP_004044063.1_Haloferax_volcanii                  | -----                                                         | 640 |
| OIO62505.1_Candidatus_Woeseearchaeota_archaeon     | -----                                                         | 633 |
| OLC36512.1_Thaumarchaeota_archaeon                 | -----                                                         | 643 |
| OLS12352.1_Candidatus_Lokiarchaeota_archaeon_CR_4  | -----                                                         | 638 |
| TAL51517.1_Nanoarchaeota_archaeon                  | -----                                                         | 633 |
| WP_011007526.1_Pyrobaculum_aerophilum              | -----                                                         | 634 |
| RLI34429.1_Candidatus_Bathyarchaeota_archaeon      | -----                                                         | 646 |
| WP_014513953.1_Sulfolobus_islandicus               | -----                                                         | 638 |
| WP_011277529.1_Sulfolobus_acidocaldarius           | -----                                                         | 631 |
| RLG13324.1_Candidatus_Nanohaloarchaeota_archaeon   | -----                                                         | 626 |
| OLC64863.1_Candidatus_Rokubacteria_bacterium       | -----                                                         | 635 |
| OEU57241.1_Desulfuromonadales_bacterium_C00003096  | -----                                                         | 628 |
| OGM94118.1_Candidatus_Wolfecubacteria_bacterium    | -----                                                         | 630 |
| OGZ62538.1_Candidatus_Staskawiczbacteria_bacterium | -----                                                         | 627 |
| RKX64688.1_Tenericutes_bacterium                   | -----                                                         | 541 |
| NP_057291.1_Homo_sapiens                           | -----KPALKVF---KNIITVIQEPGMVLEWLANPNSNDMYADTVTIVILEVQSNPK     | 592 |
| NP_650738.1_Drosophila_melanogaster                | -----ERKLRVF---GCIELTVEQKLIIVMEWQATHVNDVYADAVLACIMQSELGCT     | 597 |
| NP_502553.2_Caenorhabditis_elegans                 | KEISKKGVSVTQAITVFGQKVVVTVYGNHVVVVRWDSNPFVYDYMADSVVAAILHAQANFV | 605 |
| NP_013379.1_Saccharomyces_cerevisiae               | -----                                                         | 474 |

|                                                    |                                                               |     |
|----------------------------------------------------|---------------------------------------------------------------|-----|
| WP_011250379.1_Thermococcus_kodakarensis           | -----                                                         | 648 |
| WP_048048997.1_Methanosarcina_mazei                | -----                                                         | 637 |
| WP_004044063.1_Haloferax_volcanii                  | -----                                                         | 640 |
| OIO62505.1_Candidatus_Woeseearchaeota_archaeon     | -----                                                         | 633 |
| OLC36512.1_Thaumarchaeota_archaeon                 | -----                                                         | 643 |
| OLS12352.1_Candidatus_Lokiarchaeota_archaeon_CR_4  | -----                                                         | 638 |
| TAL51517.1_Nanoarchaeota_archaeon                  | -----                                                         | 633 |
| WP_011007526.1_Pyrobaculum_aerophilum              | -----                                                         | 634 |
| RLI34429.1_Candidatus_Bathyarchaeota_archaeon      | -----                                                         | 646 |
| WP_014513953.1_Sulfolobus_islandicus               | -----                                                         | 638 |
| WP_011277529.1_Sulfolobus_acidocaldarius           | -----                                                         | 631 |
| RLG13324.1_Candidatus_Nanohaloarchaeota_archaeon   | -----                                                         | 626 |
| OLC64863.1_Candidatus_Rokubacteria_bacterium       | -----                                                         | 635 |
| OEU57241.1_Desulfuromonadales_bacterium_C00003096  | -----                                                         | 628 |
| OGM94118.1_Candidatus_Wolfecubacteria_bacterium    | -----                                                         | 630 |
| OGZ62538.1_Candidatus_Staskawiczbacteria_bacterium | -----                                                         | 627 |
| RKX64688.1_Tenericutes_bacterium                   | -----                                                         | 541 |
| NP_057291.1_Homo_sapiens                           | IRKGAQVQVSKKLEMHVYSKRLEIMLQDIFGEDCVSV-KDDSIILSVTV-DGKTANLNLET | 650 |
| NP_650738.1_Drosophila_melanogaster                | NLRGATKQT--KSEDSRFRECLIEITLQDTPFGDNCVPMFEGDLLPVTV-SGKRAEINLET | 654 |
| NP_502553.2_Caenorhabditis_elegans                 | PDKYLP----SNSSFPPQNTAIEGMVKHICGDDVSIVMSEGLLAQFEEDGRRLLVEGSS   | 661 |
| NP_013379.1_Saccharomyces_cerevisiae               | -----                                                         | 474 |

|                                                    |                                               |     |
|----------------------------------------------------|-----------------------------------------------|-----|
| WP_011250379.1_Thermococcus_kodakarensis           | -----                                         | 648 |
| WP_048048997.1_Methanosarcina_mazei                | -----                                         | 637 |
| WP_004044063.1_Haloferax_volcanii                  | -----                                         | 640 |
| OIO62505.1_Candidatus_Woeseearchaeota_archaeon     | -----                                         | 633 |
| OLC36512.1_Thaumarchaeota_archaeon                 | -----                                         | 643 |
| OLS12352.1_Candidatus_Lokiarchaeota_archaeon_CR_4  | -----                                         | 638 |
| TAL51517.1_Nanoarchaeota_archaeon                  | -----                                         | 633 |
| WP_011007526.1_Pyrobaculum_aerophilum              | -----                                         | 634 |
| RLI34429.1_Candidatus_Bathyarchaeota_archaeon      | -----                                         | 646 |
| WP_014513953.1_Sulfolobus_islandicus               | -----                                         | 638 |
| WP_011277529.1_Sulfolobus_acidocaldarius           | -----                                         | 631 |
| RLG13324.1_Candidatus_Nanohaloarchaeota_archaeon   | -----                                         | 626 |
| OLC64863.1_Candidatus_Rokubacteria_bacterium       | -----                                         | 635 |
| OEU57241.1_Desulfuromonadales_bacterium_C00003096  | -----                                         | 628 |
| OGM94118.1_Candidatus_Wolfecubacteria_bacterium    | -----                                         | 630 |
| OGZ62538.1_Candidatus_Staskawiczbacteria_bacterium | -----                                         | 627 |
| RKX64688.1_Tenericutes_bacterium                   | -----                                         | 541 |
| NP_057291.1_Homo_sapiens                           | --RTVECEEGSEDDSLREMVLEAAQRLYEALTPVH-----      | 684 |
| NP_650738.1_Drosophila_melanogaster                | --LAISCAEDDV---LRQLMNTTVQKLHQLTVSAL-----      | 684 |
| NP_502553.2_Caenorhabditis_elegans                 | DGPVMMGGDDPMDPTTSHLLQNLTEKMRQIVTNTNEVNEIDDMEC | 707 |

**Supplementary Information Figure 2. SDS-PAGE of total cell lysates derived from *T. kodakarensis* strains IR5 and TS559 grown in the absence and presence of NaF.** 10 µg of total protein from each strain grown in the absence or presence of 4 mM NaF was resolved via SDS-PAGE prior to transfer and quantification of FttA-levels via Western blots as shown in Figure 4, panel h (n = 3). Lane M contains Magic Mark protein ladders identified by molecular weight in KDa.

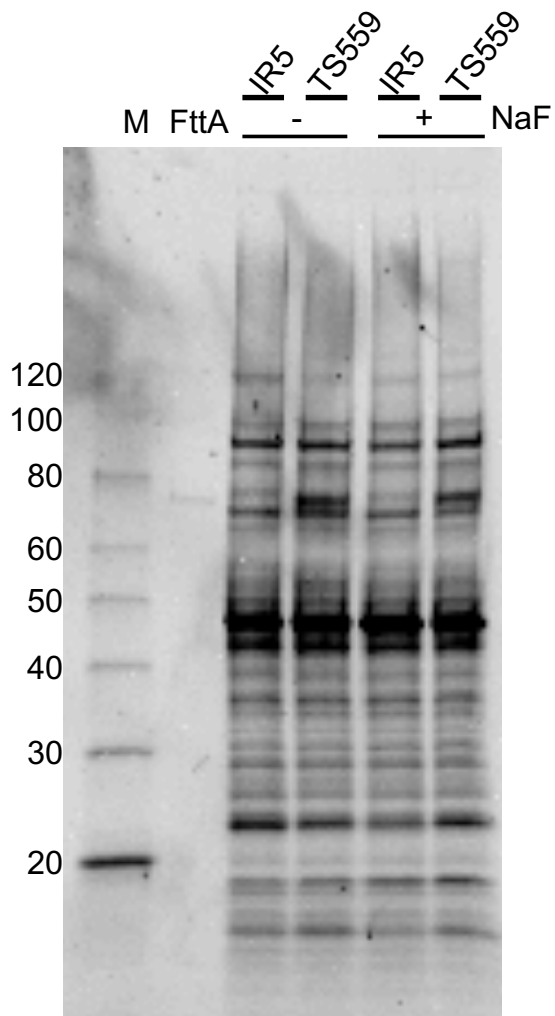

Supplement: NIHMS1548338-supplement-1.pdf [file NIHMS1548338-supplement-1.pdf]
